# Supplementary material
Source: PubMed Central journal article supplement (PMC6777269)

## Supplementary Online Content

Stone GW, Kimura T, Gao R, et al. Time-varying outcomes with the ABSORB bioresorbable vascular scaffold during 5-year follow-up: a systematic meta-analysis and individual patient data pooled study. *JAMA Cardiol*. Published online September 27, 2019.  
doi:10.1001/jamacardio.2019.4101

**eTable 1.** PRISMA checklist

**eTable 2.** Risk of bias in the 4 ABSORB trials

**eTable 3.** Baseline clinical features and antiplatelet medications

**eTable 4.** Baseline angiographic features (core laboratory)

**eTable 5.** Procedural and angiographic results (core laboratory)

**eTable 6.** Antiplatelet agent use during follow-up

**eTable 7.** Adverse event rates occurring within 5 years, within 3 years and between 3 years and 5 years after multiple imputation to account for missing follow-up data

**eTable 8.** Independent predictors of target lesion failure by Cox regression between 0 to 5 years, 0 to 3 years and 3 to 5 years

**eTable 9.** Aggregate level treatment effects from 0 through 5 years

**eTable 10.** Aggregate level treatment effects from 0 through 3 years

**eTable 11.** Aggregate level treatment effects between 3 years and 5 years

**eTable 12.** Adverse event rates occurring within the first 3 years and between 3 years and 5 years, with events before 3 years censored at the landmark period

**eFigure 1.** Search strategy diagram

**eFigure 2.** Subgroup outcomes for target lesion failure between 0 to 5 and 3 to 5 years

**eFigure 3.** Aggregate level meta-analysis, cumulative outcomes through 5 years

**eFigure 4.** Aggregate level meta-analysis, cumulative outcomes through 3 years

**eFigure 5.** Aggregate level meta-analysis, cumulative outcomes between 3 and 5 years

This supplementary material has been provided by the authors to give readers additional information about their work.

**eTable 1. PRISMA Checklist**

| Section/topic             | # | Checklist item                                                                                                                                                                                                                                                                                              | Reported on page #        |
|---------------------------|---|-------------------------------------------------------------------------------------------------------------------------------------------------------------------------------------------------------------------------------------------------------------------------------------------------------------|---------------------------|
| <b>TITLE</b>              |   |                                                                                                                                                                                                                                                                                                             |                           |
| Title                     | 1 | Identify the report as a systematic review, meta-analysis, or both.                                                                                                                                                                                                                                         | 1                         |
| <b>ABSTRACT</b>           |   |                                                                                                                                                                                                                                                                                                             |                           |
| Structured summary        | 2 | Provide a structured summary including, as applicable: background; objectives; data sources; study eligibility criteria, participants, and interventions; study appraisal and synthesis methods; results; limitations; conclusions and implications of key findings; systematic review registration number. | 3                         |
| <b>INTRODUCTION</b>       |   |                                                                                                                                                                                                                                                                                                             |                           |
| Rationale                 | 3 | Describe the rationale for the review in the context of what is already known.                                                                                                                                                                                                                              | 5                         |
| Objectives                | 4 | Provide an explicit statement of questions being addressed with reference to participants, interventions, comparisons, outcomes, and study design (PICOS).                                                                                                                                                  | 5                         |
| <b>METHODS</b>            |   |                                                                                                                                                                                                                                                                                                             |                           |
| Protocol and registration | 5 | Indicate if a review protocol exists, if and where it can be accessed (e.g., Web address), and, if available, provide registration information including registration number.                                                                                                                               | No review protocol exists |
| Eligibility criteria      | 6 | Specify study characteristics (e.g., PICOS, length of follow-up) and report characteristics (e.g., years considered, language, publication status) used as criteria for eligibility, giving rationale.                                                                                                      | 6                         |
| Information sources       | 7 | Describe all information sources (e.g., databases with dates of coverage, contact with study authors to identify additional studies) in the search and date last searched.                                                                                                                                  | 6                         |
| Search                    | 8 | Present full electronic search strategy for at least one database, including any limits used, such that it could be repeated.                                                                                                                                                                               | 6<br>Suppl. Fig 1         |

|                                    |    |                                                                                                                                                                                                                        |   |
|------------------------------------|----|------------------------------------------------------------------------------------------------------------------------------------------------------------------------------------------------------------------------|---|
| Study selection                    | 9  | State the process for selecting studies (i.e., screening, eligibility, included in systematic review, and, if applicable, included in the meta-analysis).                                                              | 6 |
| Data collection process            | 10 | Describe method of data extraction from reports (e.g., piloted forms, independently, in duplicate) and any processes for obtaining and confirming data from investigators.                                             | 6 |
| Data items                         | 11 | List and define all variables for which data were sought (e.g., PICOS, funding sources) and any assumptions and simplifications made.                                                                                  | 6 |
| Risk of bias in individual studies | 12 | Describe methods used for assessing risk of bias of individual studies (including specification of whether this was done at the study or outcome level), and how this information is to be used in any data synthesis. | 6 |
| Summary measures                   | 13 | State the principal summary measures (e.g., risk ratio, difference in means).                                                                                                                                          | 7 |
| Synthesis of results               | 14 | Describe the methods of handling data and combining results of studies, if done, including measures of consistency (e.g., $I^2$ ) for each meta-analysis.                                                              | 7 |

| Section/topic               | #  | Checklist item                                                                                                                                                  | Reported on page # |
|-----------------------------|----|-----------------------------------------------------------------------------------------------------------------------------------------------------------------|--------------------|
| Risk of bias across studies | 15 | Specify any assessment of risk of bias that may affect the cumulative evidence (e.g., publication bias, selective reporting within studies).                    | 7                  |
| Additional analyses         | 16 | Describe methods of additional analyses (e.g., sensitivity or subgroup analyses, meta-regression), if done, indicating which were pre-specified.                | 7,8                |
| <b>RESULTS</b>              |    |                                                                                                                                                                 |                    |
| Study selection             | 17 | Give numbers of studies screened, assessed for eligibility, and included in the review, with reasons for exclusions at each stage, ideally with a flow diagram. | 6                  |
| Study characteristics       | 18 | For each study, present characteristics for which data were extracted (e.g., study size, PICOS, follow-up period) and provide the citations.                    | Supplement pp 2-5  |
| Risk of bias within studies | 19 | Present data on risk of bias of each study and, if available, any outcome level assessment (see item 12).                                                       | Supplement p 35    |

|                               |    |                                                                                                                                                                                                          |                                                      |
|-------------------------------|----|----------------------------------------------------------------------------------------------------------------------------------------------------------------------------------------------------------|------------------------------------------------------|
| Results of individual studies | 20 | For all outcomes considered (benefits or harms), present, for each study: (a) simple summary data for each intervention group (b) effect estimates and confidence intervals, ideally with a forest plot. | Tables 1,2, Figures 1,2<br>Supplement pp 8-10, 12-29 |
| Synthesis of results          | 21 | Present results of each meta-analysis done, including confidence intervals and measures of consistency.                                                                                                  | Tables 1,2, Figures 1,2<br>Supplement pp 8-10, 12-29 |
| Risk of bias across studies   | 22 | Present results of any assessment of risk of bias across studies (see Item 15).                                                                                                                          | 7                                                    |
| Additional analysis           | 23 | Give results of additional analyses, if done (e.g., sensitivity or subgroup analyses, meta-regression [see Item 16]).                                                                                    | Supplement pp 7, 30                                  |
| <b>DISCUSSION</b>             |    |                                                                                                                                                                                                          |                                                      |
| Summary of evidence           | 24 | Summarize the main findings including the strength of evidence for each main outcome; consider their relevance to key groups (e.g., healthcare providers, users, and policy makers).                     | 10-12                                                |
| Limitations                   | 25 | Discuss limitations at study and outcome level (e.g., risk of bias), and at review-level (e.g., incomplete retrieval of identified research, reporting bias).                                            | 12                                                   |
| Conclusions                   | 26 | Provide a general interpretation of the results in the context of other evidence, and implications for future research.                                                                                  | 12,13                                                |
| <b>FUNDING</b>                |    |                                                                                                                                                                                                          |                                                      |
| Funding                       | 27 | Describe sources of funding for the systematic review and other support (e.g., supply of data); role of funders for the systematic review.                                                               | 13                                                   |

From: Moher D, Liberati A, Tetzlaff J, Altman DG, The PRISMA Group (2009). Preferred Reporting Items for Systematic Reviews and Meta-Analyses: The PRISMA Statement. PLoS Med 6(6): e1000097. doi:10.1371/journal.pmed1000097.

**eTable 2. Risk of bias in the 4 ABSORB trials**

|                                                                                                                        | <b>ABSORB II</b> | <b>ABSORB III</b> | <b>ABSORB China</b> | <b>ABSORB Japan</b> |
|------------------------------------------------------------------------------------------------------------------------|------------------|-------------------|---------------------|---------------------|
| <b>Domain 1: Risk of bias arising from the randomization process</b>                                                   |                  |                   |                     |                     |
|                                                                                                                        | Low risk         | Low risk          | Low risk            | Low risk            |
| <b>Domain 2: Risk of bias due to deviations from the intended interventions (effect of assignment to intervention)</b> |                  |                   |                     |                     |
|                                                                                                                        | Low risk         | Low risk          | Low risk            | Low risk            |
| <b>Domain 2: Risk of bias due to deviations from the intended interventions (effect of adhering to intervention)</b>   |                  |                   |                     |                     |
|                                                                                                                        | Low risk         | Low risk          | Low risk            | Low risk            |
| <b>Domain 3: Risk of bias due to missing outcome data</b>                                                              |                  |                   |                     |                     |
|                                                                                                                        | Some risk        | Some risk         | Some risk           | Some risk           |
| <b>Domain 4: Risk of bias in measurement of the outcome</b>                                                            |                  |                   |                     |                     |
|                                                                                                                        | Low risk         | Low risk          | Some risk           | Low risk            |
| <b>Domain 5: Risk of bias in selection of the reported result</b>                                                      |                  |                   |                     |                     |
|                                                                                                                        | Low risk         | Low risk          | Low risk            | Low risk            |

From <https://methods.cochrane.org/bias/resources/rob-2-revised-cochrane-risk-bias-tool-randomized-trials>

**eTable 3. Baseline clinical features and antiplatelet medications**

|                                         | <b>BVS<br/>(N=2161)</b> | <b>EES<br/>(N=1223)</b> |
|-----------------------------------------|-------------------------|-------------------------|
| Age (years)                             | 62.9 ± 10.8             | 62.5 ± 10.4             |
| Male                                    | 1568 (72.6%)            | 884 (72.3%)             |
| Hypertension (medically treated)        | 1622 (75.1%)            | 902 (73.8%)             |
| Hyperlipidemia (medically treated)      | 1540 (71.3%)            | 847 (69.3%)             |
| Current smoking                         | 491 (22.7%)             | 291 (23.8%)             |
| Diabetes mellitus                       | 652/2159 (30.2%)        | 367 (30.0%)             |
| - Insulin-treated                       | 207/2159 (9.6%)         | 120 (9.8%)              |
| Prior myocardial infarction             | 457/2143 (21.3%)        | 268/1218 (22.0%)        |
| Prior PCI                               | 716 (33.1%)             | 372/1221 (30.5%)        |
| Prior CABG                              | 69 (3.2%)               | 31/1221 (2.5%)          |
| Renal insufficiency*                    | 145/1557 (9.3%)         | 76/922 (8.2%)           |
| Body mass index (kg/m <sup>2</sup> )    | 28.8 ± 5.9              | 28.5 ± 5.7              |
| Pre-PCI evidence of ischemia            |                         |                         |
| - Silent ischemia                       | 253/2160 (11.7%)        | 126 (10.3%)             |
| - Stable angina                         | 1194/2160 (55.3%)       | 652 (53.3%)             |
| - Unstable angina                       | 603/2160 (27.9%)        | 379 (31.0%)             |
| - Recent MI                             | 66/2160 (3.1%)          | 49 (4.0%)               |
| - Post-MI angina                        | 16/2160 (0.7%)          | 8 (0.7%)                |
| - None                                  | 28/2160 (1.3%)          | 9 (0.7%)                |
| Aspirin**                               | 2108 (97.5%)            | 1183 (96.7%)            |
| Platelet P2Y12 receptor inhibitor use** | 2129 (98.5%)            | 1198 (98.0%)            |
| - Clopidogrel or ticlopidine            | 1615/2129 (75.9%)       | 945/1198 (78.9%)        |
| - Prasugrel or ticagrelor               | 514/2129 (24.1%)        | 253/1198 (21.1%)        |
| Glycoprotein IIb/IIIa inhibitor use     | 148/1895 (7.8%)         | 98/1089 (9.0%)          |

\*Estimated glomerular filtration rate <30 ml/min/1.73m<sup>2</sup> or dialysis at the time of screening. \*\*Index procedure loading dose. PCI = percutaneous coronary intervention. CABG = coronary artery bypass graft surgery. Adapted from Stone GW et al. 1-year outcomes with the Absorb bioresorbable scaffold in patients with coronary artery disease: a patient-level, pooled meta-analysis. Lancet 2016;387:1277-89.



**eTable 4. Baseline angiographic features (core laboratory)**

|                                       | <b>BVS<br/>(N=2161)<br/>(L=2275)</b> | <b>EES<br/>(N=1223)<br/>(L=1284)</b> |
|---------------------------------------|--------------------------------------|--------------------------------------|
| Number of lesions treated (any)*      | 1.1 ± 0.4                            | 1.2 ± 0.4                            |
| Number of target lesions treated      | 1.1 ± 0.2                            | 1.0 ± 0.2                            |
| - One target lesion                   | 2045 (94.5%)                         | 1162 (94.9%)                         |
| - Two target lesions                  | 115 (5.3%)                           | 61 (5.0%)                            |
| Target coronary artery (lesion level) |                                      |                                      |
| - Left main                           | 1 (0.0%)                             | 0 (0.0%)                             |
| - Left anterior descending            | 1046 (46.0%)                         | 575 (44.8%)                          |
| - Left circumflex                     | 581 (25.5%)                          | 357 (27.8%)                          |
| - Right                               | 647 (28.4%)                          | 352 (27.4%)                          |
| Quantitative measures (lesion level)  |                                      |                                      |
| - Reference vessel diameter, mm       | 2.68 ± 0.44                          | 2.69 ± 0.46                          |
| - Minimal luminal diameter, mm        | 0.96 ± 0.37                          | 0.95 ± 0.36                          |
| - Diameter stenosis, %                | 64.1 ± 12.4                          | 64.6 ± 12.0                          |
| - Lesion length, mm                   | 13.1 ± 5.6                           | 13.4 ± 5.7                           |
| Lesion characteristics (lesion level) |                                      |                                      |
| - Calcification (moderate or severe)  | 623/2267 (27.5%)                     | 339/1277 (26.5%)                     |
| - Tortuosity (moderate or severe)     | 103/2268 (4.5%)                      | 59/1277 (4.6%)                       |
| - Eccentric                           | 1823/2267 (80.4%)                    | 1014/1273 (79.7%)                    |
| - Bifurcation <sup>†</sup>            | 751/2268 (33.1%)                     | 449/1274 (35.2%)                     |
| - Thrombus                            | 8/2268 (0.4%)                        | 4/1275 (0.3%)                        |
| - ACC/AHA class B2/C                  | 1511/2270 (66.6%)                    | 887/1276 (69.5%)                     |

\*Randomized target lesions plus non-randomized non-target lesions in a separate epicardial coronary artery.

<sup>†</sup>Defined by the angiographic core laboratory as having a side branch with diameter ≥1.5 mm. The protocol of each study excluded bifurcation lesions with a side branch diameter ≥2.0 mm by visual estimate. N = number of patients; L = number of target lesions. Adapted from Stone GW et al. 1-year outcomes with the Absorb bioresorbable scaffold in patients with coronary artery disease: a patient-level, pooled meta-analysis. Lancet 2016;387:1277-89.



**eTable 5. Procedural and angiographic results (core laboratory)**

|                                               | <b>BVS<br/>(N=2161)<br/>(L=2275)</b> | <b>EES<br/>(N=1223)<br/>(L=1284)</b> | <b>P value</b> |
|-----------------------------------------------|--------------------------------------|--------------------------------------|----------------|
| IVUS or OCT guidance (per procedure)          | 512/2141 (23.9%)                     | 246/1210 (20.3%)                     | 0.02           |
| Number of study devices per patient           | 1.1 ± 0.4                            | 1.1 ± 0.4                            | 0.98           |
| Total device length per lesion, mm            | 18.8 ± 6.9                           | 19.6 ± 7.1                           | 0.0008         |
| Overlapping study devices per lesion          | 159 (7.0%)                           | 95 (7.4%)                            | 0.65           |
| Maximum device diameter per lesion, mm*       | 3.17 ± 0.41                          | 3.16 ± 0.43                          | 0.36           |
| Maximum device pressure per lesion, atm*      | 15.5 ± 3.2                           | 15.7 ± 3.3                           | 0.28           |
| Post-dilatation performed (per lesion)        | 1505 (66.2%)                         | 710 (55.3%)                          | <0.0001        |
| Bail-out device used (per lesion)             | 101 (4.4%)                           | 72 (5.6%)                            | 0.12           |
| Post-PCI quantitative measures (lesion level) |                                      |                                      |                |
| - Reference vessel diameter, mm               | 2.71 ± 0.44                          | 2.75 ± 0.45                          | 0.02           |
| - In-device                                   |                                      |                                      |                |
| - Acute gain, mm                              | 1.41 ± 0.45                          | 1.58 ± 0.43                          | <0.0001        |
| - Minimal luminal diameter, mm                | 2.37 ± 0.39                          | 2.53 ± 0.40                          | <0.0001        |
| - Diameter stenosis, %                        | 12.4 ± 8.3                           | 7.5 ± 8.2                            | <0.0001        |
| - In-segment                                  |                                      |                                      |                |
| - Acute gain, mm                              | 1.20 ± 0.45                          | 1.24 ± 0.45                          | 0.04           |
| - Minimal luminal diameter, mm                | 2.16 ± 0.40                          | 2.19 ± 0.43                          | 0.07           |
| - Diameter stenosis, %                        | 19.9 ± 7.7                           | 19.9 ± 8.4                           | 0.96           |
| Device success (per lesion)                   | 2144/2243 (95.6%)                    | 1265/1272 (99.4%)                    | <0.0001        |
| Procedure success (per patient)               | 2038/2148 (94.9%)                    | 1176/1212 (97.0%)                    | 0.003          |
| Procedure duration, minutes                   | 43.7 ± 23.7                          | 39.7 ± 21.5                          | <0.0001        |

N = number of patients; L = number of target lesions. \*Device delivery system or post-dilatation balloon. IVUS = intravascular ultrasound. OCT = optical coherence tomography. Adapted from Stone GW et al. 1-year outcomes with the Absorb

**eTable 6. Antiplatelet agent use during follow-up**

|                                      | <b>BVS<br/>(N=2161)</b> | <b>EES<br/>(N=1223)</b> | <b>P<br/>value</b> |
|--------------------------------------|-------------------------|-------------------------|--------------------|
| <b>Aspirin use</b>                   |                         |                         |                    |
| Discharge                            | 2134/2158 (98.9%)       | 1214 (99.3%)            | 0.28               |
| 1 year                               | 2070/2114 (97.9%)       | 1173/1201 (97.7%)       | 0.64               |
| 2 years                              | 1982/2058 (96.3%)       | 1118/1170 (95.6%)       | 0.29               |
| 3 years                              | 1907/2003 (95.2%)       | 1061/1126 (94.2%)       | 0.23               |
| 4 years                              | 1758/1863 (94.4%)       | 1000/1073 (93.2%)       | 0.20               |
| 5 years                              | 1658/1762 (94.1%)       | 938/1017 (92.2%)        | 0.06               |
| <b>P2Y12 inhibitor use</b>           |                         |                         |                    |
| Discharge                            | 2125/2158 (98.5%)       | 1209 (98.9%)            | 0.36               |
| 1 year                               | 2041/2114 (96.5%)       | 1152/1201 (95.9%)       | 0.36               |
| 2 years                              | 1180/2058 (57.3%)       | 629/1170 (53.8%)        | 0.05               |
| 3 years                              | 1044/2003 (52.1%)       | 539/1126 (47.9%)        | 0.02               |
| 4 years                              | 902/1863 (48.4%)        | 470/1073 (43.8%)        | 0.02               |
| 5 years                              | 762/1762 (43.2%)        | 408/1017 (40.1%)        | 0.11               |
| <b>Dual antiplatelet therapy use</b> |                         |                         |                    |
| Discharge                            | 2106/2158 (97.6%)       | 1202 (98.3%)            | 0.18               |
| 1 year                               | 2002/2114 (94.7%)       | 1128/1201 (93.9%)       | 0.35               |
| 2 years                              | 1128/2058 (54.8%)       | 596/1170 (50.9%)        | 0.03               |
| 3 years                              | 985/2003 (49.2%)        | 496/1126 (44.0%)        | 0.006              |
| 4 years                              | 839/1863 (45.0%)        | 423/1073 (39.4%)        | 0.003              |
| 5 years                              | 701/1762 (39.8%)        | 364/1017 (35.8%)        | 0.04               |

**eTable 7. Adverse event rates occurring within 5 years, within 3 years and between 3 years and 5 years after multiple imputation to account for missing follow-up data**

|                       | From randomization to 5 years |       |                   | From randomization to 3 years |       |                   | From 3 years to 5 years |      |                   | P <sub>interaction</sub> |
|-----------------------|-------------------------------|-------|-------------------|-------------------------------|-------|-------------------|-------------------------|------|-------------------|--------------------------|
|                       | BVS                           | EES   | HR [95%CI]        | BVS                           | EES   | HR [95%CI]        | BVS                     | EES  | HR [95%CI]        |                          |
| TLF                   | 14.9%                         | 11.7% | 1.24 (1.01, 1.52) | 11.5%                         | 8.1%  | 1.39 (1.09, 1.76) | 4.4%                    | 4.4% | 0.94 (0.66, 1.34) | 0.09                     |
| POCE                  | 26.4%                         | 22.9% | 1.14 (0.98, 1.31) | 19.9%                         | 16.0% | 1.22 (1.03, 1.45) | 9.5%                    | 9.3% | 0.97 (0.76, 1.24) | 0.27                     |
| All-cause mortality   | 5.9%                          | 5.6%  | 1.01 (0.75, 1.37) | 2.6%                          | 3.0%  | 0.85 (0.56, 1.31) | 3.4%                    | 2.7% | 1.20 (0.78, 1.87) | 0.27                     |
| - Cardiac             | 2.3%                          | 2.7%  | 0.83 (0.52, 1.31) | 1.1%                          | 1.1%  | 0.96 (0.48, 1.90) | 1.2%                    | 1.7% | 0.70 (0.38, 1.31) | 0.41                     |
| - Non-cardiac*        | 3.7%                          | 3.0%  | 1.18 (0.78, 1.78) | 1.6%                          | 1.9%  | 0.79 (0.46, 1.37) | 2.2%                    | 1.1% | 1.98 (1.02, 3.84) | 0.04                     |
| All MI                | 10.7%                         | 8.0%  | 1.28 (1.01, 1.64) | 8.9%                          | 5.6%  | 1.51 (1.14, 2.00) | 2.1%                    | 2.6% | 0.74 (0.45, 1.20) | 0.02                     |
| - TV-MI               | 8.8%                          | 5.5%  | 1.51 (1.14, 2.01) | 7.5%                          | 4.2%  | 1.70 (1.24, 2.34) | 1.5%                    | 1.4% | 0.99 (0.53, 1.86) | 0.09                     |
| - Non-TV-MI           | 2.6%                          | 3.0%  | 0.82 (0.53, 1.25) | 1.9%                          | 1.8%  | 1.01 (0.59, 1.72) | 0.7%                    | 1.3% | 0.47 (0.22, 1.02) | 0.12                     |
| All revascularization | 18.4%                         | 16.4% | 1.09 (0.92, 1.30) | 14.2%                         | 11.8% | 1.18 (0.96, 1.44) | 5.8%                    | 6.2% | 0.88 (0.65, 1.19) | 0.15                     |
| ID-TLR                | 8.4%                          | 6.0%  | 1.37 (1.03, 1.81) | 6.5%                          | 4.4%  | 1.43 (1.04, 1.98) | 2.3%                    | 1.8% | 1.20 (0.70, 2.05) | 0.64                     |
| Device thrombosis     | 2.5%                          | 0.9%  | 2.67 (1.36, 5.22) | 2.4%                          | 0.6%  | 3.51 (1.59, 7.74) | 0.1%                    | 0.3% | 0.47 (0.08, 2.85) | 0.03                     |

Event rates are Kaplan-Meier time-to-first event estimates. Event rates are non-hierarchical. The 3-year to 5-year landmark period includes all randomized patients at 3 years except those who died before 3 years (day 1095). Thus there may be some patients with a non-fatal event within 3 years who have a second event between 3 years and 5 years. \*Includes non-cardiac vascular deaths. HR [95% CI] denotes hazard ratio and 95% confidence interval; ID-TLR denotes ischemia-driven target lesion revascularization; ID-TVR MI denotes ischemia-driven target vessel revascularization; myocardial infarction; denotes POCE denotes patient oriented composite endpoint (all death, all MI, all revascularization); TLF denotes target lesion failure (cardiac death, TV-MI or ID-TLR); TV-MI denotes target vessel-related MI.

**eTable 8. Independent predictors of target lesion failure by Cox regression between 0 to 5 years, 0 to 3 years and 3 to 5 years**

|                                          | Between 0 and 5 years |         | Between 0 and 3 years |         | Between 3 and 5 years |         |
|------------------------------------------|-----------------------|---------|-----------------------|---------|-----------------------|---------|
|                                          | HR [95% CI]           | P value | HR [95% CI]           | P value | HR [95% CI]           | P value |
| Treatment with BVS (vs EES)              | 1.28 (1.05, 1.57)     | 0.02    | 1.44 (1.13, 1.83)     | 0.003   | 0.95 (0.67, 1.36)     | 0.79    |
| Age (per year)                           | 1.01 (1.00, 1.03)     | 0.004   | 1.01 (1.00, 1.03)     | 0.02    | 1.01 (0.99, 1.03)     | 0.23    |
| Male sex                                 | 1.11 (0.89, 1.38)     | 0.37    | 1.15 (0.89, 1.48)     | 0.28    | 0.85 (0.58, 1.25)     | 0.41    |
| Diabetes                                 | 1.55 (1.27, 1.90)     | <0.0001 | 1.36 (1.08, 1.72)     | 0.008   | 1.95 (1.36, 2.80)     | 0.0003  |
| Hypertension                             | 1.21 (0.92, 1.60)     | 0.18    | 1.06 (0.78, 1.44)     | 0.71    | 2.18 (1.20, 3.96)     | 0.01    |
| Dyslipidemia                             | 1.12 (0.86, 1.48)     | 0.40    | 1.12 (0.82, 1.53)     | 0.48    | 1.23 (0.74, 2.04)     | 0.42    |
| Recent smoker                            | 1.39 (1.10, 1.75)     | 0.005   | 1.40 (1.08, 1.82)     | 0.01    | 1.22 (0.79, 1.90)     | 0.37    |
| Prior PCI                                | 1.36 (1.08, 1.72)     | 0.009   | 1.39 (1.06, 1.81)     | 0.02    | 1.44 (0.94, 2.20)     | 0.09    |
| Prior myocardial infarction              | 0.98 (0.76, 1.26)     | 0.87    | 1.07 (0.81, 1.42)     | 0.65    | 0.61 (0.36, 1.02)     | 0.06    |
| Body mass index (per kg/m <sup>2</sup> ) | 1.01 (1.00, 1.03)     | 0.14    | 1.02 (1.00, 1.04)     | 0.06    | 0.99 (0.96, 1.02)     | 0.62    |
| Stable CAD (vs. ACS)                     | 0.95 (0.77, 1.17)     | 0.65    | 0.91 (0.72, 1.16)     | 0.45    | 1.01 (0.69, 1.49)     | 0.94    |
| No of treated lesions (2 vs 1)           | 1.14 (0.77, 1.71)     | 0.51    | 1.05 (0.66, 1.67)     | 0.82    | 1.47 (0.72, 2.98)     | 0.29    |
| Any LM or LAD lesion                     | 0.99 (0.81, 1.21)     | 0.91    | 0.99 (0.79, 1.25)     | 0.94    | 1.11 (0.76, 1.61)     | 0.59    |
| RVD (per 1 mm)*                          | 0.73 (0.58, 0.92)     | 0.008   | 0.58 (0.44, 0.77)     | 0.0001  | 1.31 (0.87, 1.98)     | 0.19    |
| Lesion length (per 5 mm)**               | 1.03 (0.94, 1.12)     | 0.58    | 1.01 (0.91, 1.12)     | 0.83    | 1.06 (0.90, 1.25)     | 0.49    |
| Diameter stenosis (per 5%) <sup>†</sup>  | 0.97 (0.93, 1.01)     | 0.18    | 0.97 (0.92, 1.01)     | 0.17    | 0.99 (0.92, 1.06)     | 0.75    |
| Any moderate/severe calcified lesion     | 1.16 (0.92, 1.45)     | 0.20    | 1.18 (0.91, 1.53)     | 0.21    | 1.08 (0.71, 1.63)     | 0.73    |
| Any type B2/C lesion                     | 1.00 (0.78, 1.28)     | 0.99    | 1.07 (0.81, 1.42)     | 0.62    | 0.83 (0.53, 1.31)     | 0.42    |
| Any bifurcation lesion                   | 1.24 (1.01, 1.53)     | 0.04    | 1.20 (0.95, 1.52)     | 0.13    | 1.20 (0.83, 1.73)     | 0.34    |

\*In patients with 2 lesions, the smallest RVD. \*\* In patients with 2 lesions, the longest lesion length. <sup>†</sup>In patients with 2 lesions, the most severe diameter stenosis. ACS denotes acute coronary syndrome. CAD denotes coronary artery disease. LAD denotes left anterior descending coronary artery disease. LM denotes left main coronary artery disease. PCI denotes percutaneous coronary intervention. RVD denotes reference vessel diameter.

**eTable 9. Aggregate level treatment effects from 0 through 5 years**

|                                          | Number of events |              | Fixed Effect      |         | Random Effect     |         | Heterogeneity  |         |
|------------------------------------------|------------------|--------------|-------------------|---------|-------------------|---------|----------------|---------|
|                                          | BVS (n=2161)     | EES (n=1223) | RR [95% CI]       | P-value | RR [95% CI]       | P-value | I <sup>2</sup> | P-value |
| Target lesion failure                    | 308              | 135          | 1.23 [1.02, 1.49] | 0.03    | 1.23 [1.02, 1.48] | 0.03    | 0.0%           | 0.73    |
| POCE                                     | 550              | 267          | 1.12 [0.99, 1.28] | 0.07    | 1.12 [0.99, 1.28] | 0.08    | 0.0%           | 0.67    |
| All-cause mortality                      | 119              | 64           | 1.01 [0.75, 1.37] | 0.93    | 1.01 [0.75, 1.36] | 0.97    | 0.0%           | 0.58    |
| - Cardiac                                | 44               | 31           | 0.78 [0.50, 1.24] | 0.30    | 0.78 [0.49, 1.24] | 0.30    | 0.0%           | 0.89    |
| - Non-cardiac*                           | 75               | 33           | 1.23 [0.82, 1.84] | 0.33    | 1.22 [0.81, 1.83] | 0.35    | 0.0%           | 0.78    |
| All myocardial infarction                | 221              | 92           | 1.28 [1.01, 1.61] | 0.04    | 1.27 [1.01, 1.60] | 0.04    | 0.0%           | 0.80    |
| - TV-MI                                  | 184              | 64           | 1.52 [1.16, 2.00] | 0.003   | 1.50 [1.14, 1.98] | 0.004   | 0.0%           | 0.61    |
| - Non-TV-MI                              | 51               | 35           | 0.78 [0.51, 1.19] | 0.25    | 0.78 [0.51, 1.19] | 0.25    | 0.0%           | 1.00    |
| All revascularization                    | 378              | 189          | 1.09 [0.93, 1.28] | 0.28    | 1.09 [0.93, 1.28] | 0.29    | 0.0%           | 0.59    |
| ID-TVR                                   | 268              | 112          | 1.30 [1.05, 1.60] | 0.02    | 1.30 [1.05, 1.60] | 0.02    | 0.0%           | 0.96    |
| ID-TLR                                   | 172              | 67           | 1.40 [1.06, 1.83] | 0.02    | 1.50 [1.00, 2.26] | 0.052   | 25.5%          | 0.26    |
| Device thrombosis (definite or probable) | 53               | 10           | 2.75 [1.42, 5.31] | 0.003   | 2.59 [1.33, 5.03] | 0.005   | 0.0%           | 0.82    |
| - Definite                               | 48               | 8            | 2.87 [1.41, 5.84] | 0.004   | 2.68 [1.31, 5.47] | 0.007   | 0.0%           | 0.77    |
| - Probable                               | 5                | 2            | 1.17 [0.33, 4.18] | 0.81    | 1.20 [0.28, 5.10] | 0.80    | 0.0%           | 0.59    |

\*Includes non-cardiac vascular deaths. ID-TLR denotes ischemia-driven target lesion revascularization; ID-TVR MI denotes ischemia-driven target vessel revascularization; myocardial infarction; denotes POCE denotes patient oriented composite endpoint (all death, all MI, all revascularization); RR [95% CI] denotes relative risk and 95% confidence interval; TLF denotes target lesion failure (cardiac death, TV-MI or ID-TLR); TV-MI denotes target vessel-related MI.



**eTable 10. Aggregate level treatment effects from 0 through 3 years**

|                           | Number of events |              | Fixed Effect      |         | Random Effect     |         | Heterogeneity  |         |
|---------------------------|------------------|--------------|-------------------|---------|-------------------|---------|----------------|---------|
|                           | BVS (n=2161)     | EES (n=1223) | RR [95% CI]       | P-value | RR [95% CI]       | P-value | I <sup>2</sup> | P-value |
| Target lesion failure     | 245              | 95           | 1.40 [1.11, 1.75] | 0.004   | 1.39 [1.11, 1.74] | 0.005   | 0.0%           | 0.75    |
| POCE                      | 422              | 190          | 1.21 [1.04, 1.42] | 0.02    | 1.19 [0.98, 1.44] | 0.08    | 16.4%          | 0.31    |
| All-cause mortality       | 54               | 35           | 0.84 [0.55, 1.29] | 0.43    | 0.84 [0.55, 1.30] | 0.45    | 0.0%           | 0.45    |
| - Cardiac                 | 22               | 13           | 0.92 [0.46, 1.83] | 0.82    | 0.93 [0.46, 1.88] | 0.83    | 0.0%           | 0.58    |
| - Non-cardiac*            | 32               | 22           | 0.78 [0.45, 1.35] | 0.38    | 0.79 [0.45, 1.36] | 0.39    | 0.0%           | 0.75    |
| All myocardial infarction | 190              | 66           | 1.54 [1.17, 2.02] | 0.002   | 1.52 [1.16, 1.99] | 0.003   | 0.0%           | 0.67    |
| - TV-MI                   | 161              | 49           | 1.74 [1.27, 2.37] | 0.0005  | 1.69 [1.24, 2.32] | 0.0009  | 0.0%           | 0.46    |
| - Non-TV-MI               | 39               | 21           | 1.01 [0.60, 1.72] | 0.96    | 1.01 [0.59, 1.72] | 0.97    | 0.0%           | 0.95    |
| All revascularization     | 299              | 138          | 1.19 [0.99, 1.44] | 0.07    | 1.13 [0.87, 1.48] | 0.36    | 32.3%          | 0.22    |
| ID-TVR                    | 208              | 77           | 1.47 [1.14, 1.90] | 0.003   | 1.47 [1.14, 1.89] | 0.003   | 0.0%           | 0.70    |
| ID-TLR                    | 137              | 51           | 1.47 [1.07, 2.01] | 0.02    | 1.44 [1.05, 1.97] | 0.02    | 0.0%           | 0.47    |
| Device thrombosis         | 51               | 7            | 3.46 [1.65, 7.25] | 0.001   | 3.27 [1.55, 6.89] | 0.002   | 0.0%           | 0.84    |
| - Definite                | 47               | 6            | 3.63 [1.64, 8.03] | 0.001   | 3.47 [1.56, 7.68] | 0.002   | 0.0%           | 0.91    |
| - Probable                | 4                | 1            | 1.19 [0.31, 4.59] | 0.80    | 1.20 [0.25, 5.83] | 0.82    | 0.0%           | 0.57    |

\*Includes non-cardiac vascular deaths. Abbreviations as in Table 7.

**eTable 11. Aggregate level treatment effects between 3 years and 5 years**

|                                          | Number of events |              | Fixed Effect       |         | Random Effect      |         | Heterogeneity  |         |
|------------------------------------------|------------------|--------------|--------------------|---------|--------------------|---------|----------------|---------|
|                                          | BVS (n=2161)     | EES (n=1223) | RR [95% CI]        | P-value | RR [95% CI]        | P-value | I <sup>2</sup> | P-value |
| Target lesion failure                    | 82               | 48           | 0.91 [0.64, 1.28]  | 0.58    | 0.89 [0.63, 1.27]  | 0.53    | 0.0%           | 0.65    |
| POCE                                     | 180              | 100          | 0.96 [0.76, 1.22]  | 0.75    | 0.96 [0.76, 1.21]  | 0.74    | 0.0%           | 0.80    |
| All-cause mortality                      | 65               | 29           | 1.21 [0.79, 1.86]  | 0.39    | 1.19 [0.77, 1.84]  | 0.42    | 0.0%           | 0.83    |
| - Cardiac                                | 22               | 18           | 0.67 [0.36, 1.24]  | 0.20    | 0.67 [0.36, 1.24]  | 0.20    | 0.0%           | 0.92    |
| - Non-cardiac*                           | 43               | 11           | 2.09 [1.08, 4.04]  | 0.03    | 2.07 [1.07, 4.01]  | 0.03    | 0.0%           | 0.98    |
| All myocardial infarction                | 38               | 28           | 0.71 [0.44, 1.15]  | 0.16    | 0.71 [0.44, 1.15]  | 0.16    | 0.0%           | 0.97    |
| - TV-MI                                  | 27               | 15           | 0.95 [0.51, 1.78]  | 0.88    | 0.95 [0.51, 1.78]  | 0.87    | 0.0%           | 0.98    |
| - Non-TV-MI                              | 12               | 14           | 0.44 [0.21, 0.94]  | 0.03    | 0.45 [0.21, 0.95]  | 0.04    | 0.0%           | 0.83    |
| All revascularization                    | 108              | 67           | 0.86 [0.64, 1.15]  | 0.31    | 0.85 [0.63, 1.15]  | 0.30    | 0.0%           | 0.60    |
| ID-TVR                                   | 77               | 39           | 1.04 [0.71, 1.52]  | 0.84    | 1.02 [0.69, 1.49]  | 0.93    | 0.0%           | 0.58    |
| ID-TLR                                   | 43               | 19           | 1.17 [0.69, 1.99]  | 0.57    | 1.09 [0.64, 1.87]  | 0.74    | 0.0%           | 0.65    |
| Device thrombosis (definite or probable) | 2                | 3            | 0.46 [0.08, 2.55]  | 0.37    | 0.46 [0.07, 2.80]  | 0.40    | 0.0%           | 0.47    |
| - Definite                               | 1                | 2            | 0.26 [0.02, 2.83]  | 0.27    | 0.26 [0.02, 2.83]  | 0.27    | -              | -       |
| - Probable                               | 1                | 1            | 0.98 [0.06, 15.55] | 0.99    | 0.98 [0.06, 15.55] | 0.99    | -              | -       |

\*Includes non-cardiac vascular deaths. Abbreviations as in Table 8.



**eTable 12. Adverse event rates occurring within the first 3 years and between 3 years and 5 years, with events before 3 years censored at the landmark period**

|                                      | From randomization to 3 years |                 |                   | From 3 years to 5 years |                 |                   | P <sub>Interaction</sub> |
|--------------------------------------|-------------------------------|-----------------|-------------------|-------------------------|-----------------|-------------------|--------------------------|
|                                      | BVS<br>(n=2161)               | EES<br>(n=1223) | HR [95%CI]        | BVS<br>(n=1984)         | EES<br>(n=1121) | HR [95%CI]        |                          |
| TLF                                  | 11.6% (245)                   | 7.9% (95)       | 1.42 (1.12, 1.80) | 4.1% (72)               | 4.4% (45)       | 0.89 (0.61, 1.29) | 0.046                    |
| POCE                                 | 19.9% (422)                   | 15.8% (190)     | 1.23 (1.04, 1.46) | 9.3% (153)              | 9.0% (86)       | 0.99 (0.76, 1.29) | 0.10                     |
| All-cause mortality                  | 2.6% (54)                     | 3.0% (35)       | 0.84 (0.55, 1.29) | 3.4% (65)               | 2.7% (29)       | 1.22 (0.79, 1.90) | 0.23                     |
| - Cardiac                            | 1.1% (22)                     | 1.1% (13)       | 0.94 (0.47, 1.88) | 1.2% (22)               | 1.7% (18)       | 0.68 (0.36, 1.26) | 0.48                     |
| - Non-cardiac*                       | 1.5% (32)                     | 1.9% (22)       | 0.79 (0.46, 1.35) | 2.3% (43)               | 1.0% (11)       | 2.11 (1.09, 4.10) | 0.02                     |
| All MI                               | 9.0% (190)                    | 5.5% (66)       | 1.56 (1.18, 2.06) | 1.8% (31)               | 2.5% (26)       | 0.65 (0.39, 1.10) | 0.004                    |
| - TV-MI                              | 7.6% (161)                    | 4.1% (49)       | 1.76 (1.28, 2.43) | 1.3% (23)               | 1.4% (15)       | 0.85 (0.44, 1.64) | 0.05                     |
| - Non-TV-MI                          | 1.9% (39)                     | 1.8% (21)       | 1.01 (0.59, 1.73) | 0.7% (12)               | 1.3% (14)       | 0.44 (0.20, 0.96) | 0.08                     |
| All revascularization                | 14.3% (299)                   | 11.6% (138)     | 1.20 (0.98, 1.47) | 4.8% (79)               | 5.3% (51)       | 0.84 (0.59, 1.19) | 0.08                     |
| ID-TLR                               | 6.6% (137)                    | 4.3% (51)       | 1.48 (1.07, 2.04) | 2.0% (35)               | 1.6% (16)       | 1.18 (0.65, 2.14) | 0.52                     |
| Device thrombosis, definite/probable | 2.4% (51)                     | 0.6% (7)        | 3.86 (1.75, 8.50) | 0.1% (2)                | 0.3% (3)        | 0.45 (0.07, 2.73) | 0.03                     |

Event rates are Kaplan-Meier time-to-first event estimates expressed as % (n events). Denominators are patients known to be alive and with valid follow-up at the beginning of the interval. Event rates are hierarchical. The 3-year to 5-year landmark period excludes all randomized patients at 3 years who died or had a non-fatal event of the same type before 3 years (day 1095). The results were similar when patients with non-fatal events within the first 3 years were included from the 3-year to 5-year landmark analysis period (Table 4 of the main manuscript). Note that the interaction P values are the same in Table 4 and eTable 11. This is

because the time-to-first event data within 5 years were used to perform the interaction test in both analyses. This was done by fitting an interaction between the log hazard ratio and indicator for time (0 when time <3 years; 1 when time  $\geq$ 3 years). \*Includes non-cardiac vascular deaths.

eFigure 1. Search strategy diagram

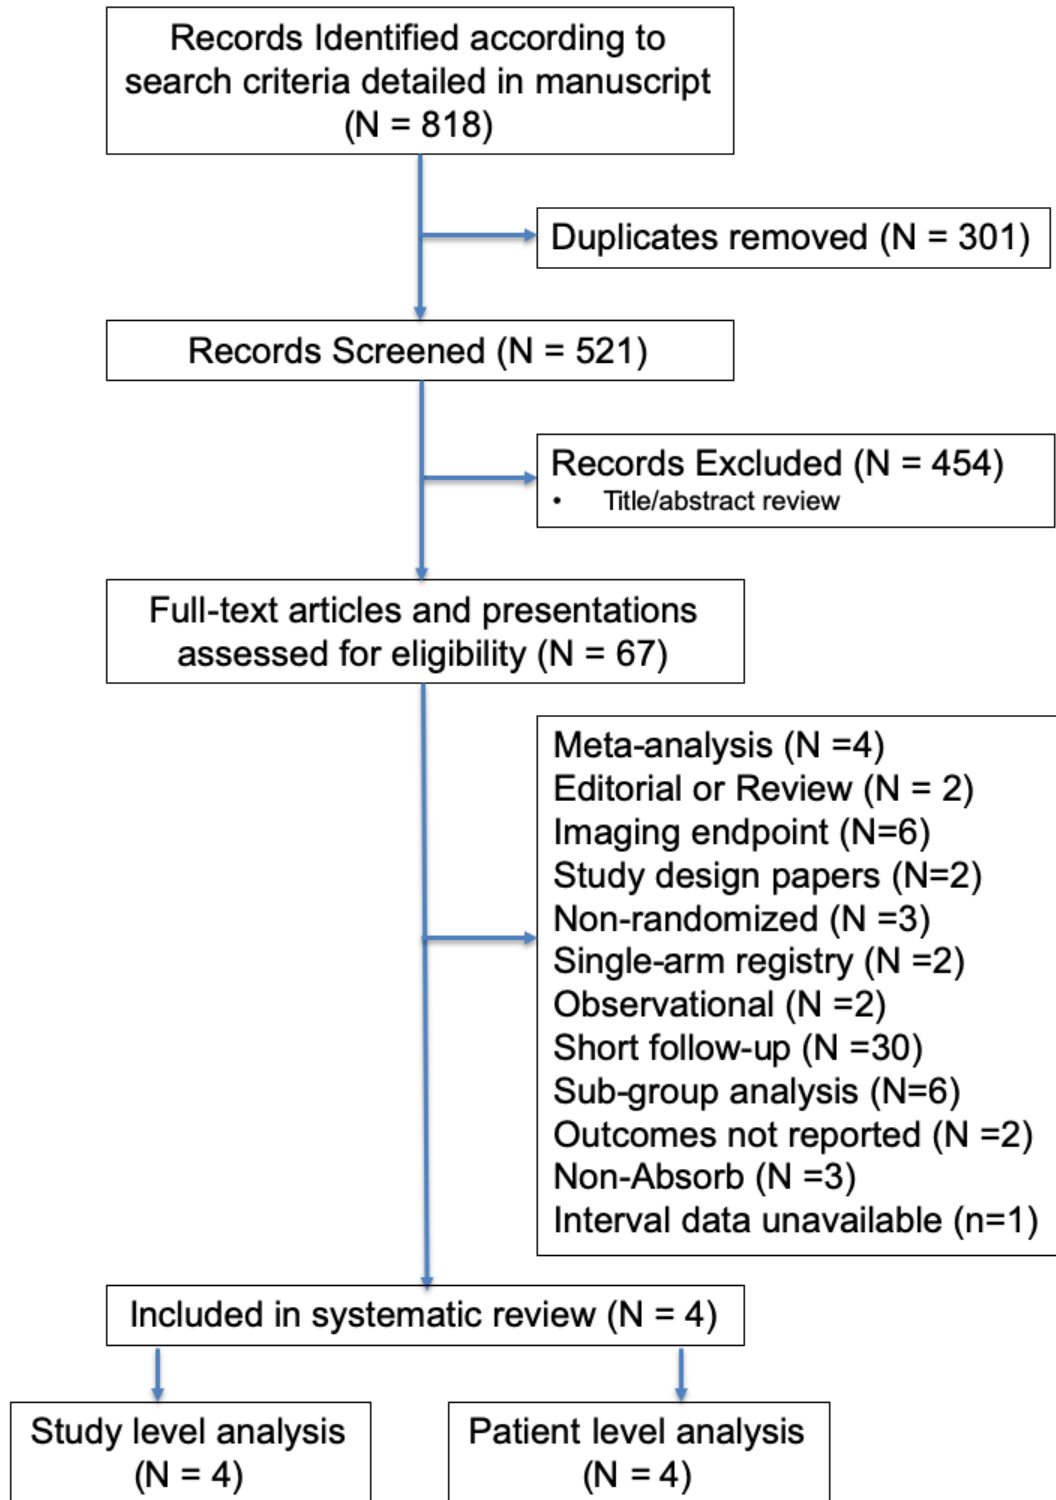

**eFigure 2. Subgroup outcomes for target lesion failure between 0 to 5 and 3 to 5 years.**

A) Outcomes between 0 and 5 years. B) Outcomes between 3 and 5 years. ACL denotes angiographic core laboratory. LAD denotes left anterior descending coronary artery. LCX denotes left circumflex coronary artery. LM denotes left main coronary artery. MLD denotes minimal luminal diameter. QCA denotes quantitative coronary angiography. RCA denotes right coronary artery. RVD denotes reference vessel diameter. P (Int) denotes P value for interaction between the subgroup and treatment.

**eFigure 2A. Subgroup outcomes for target lesion failure between 0 and 5 years**

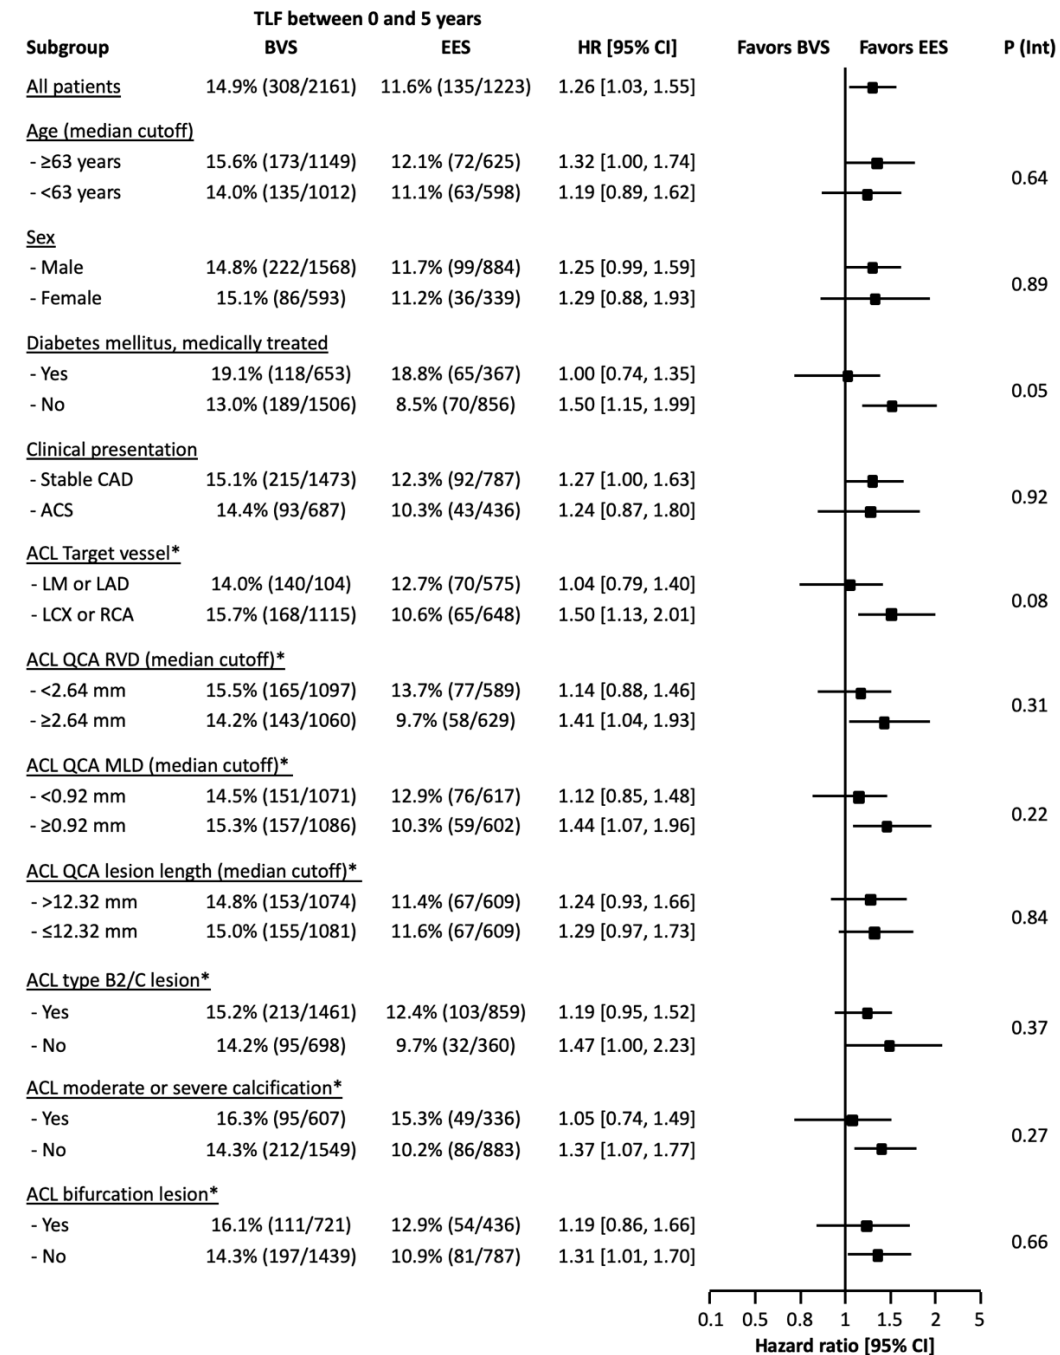

**eFigure 2B. Subgroup outcomes for target lesion failure between 3 and 5 years**

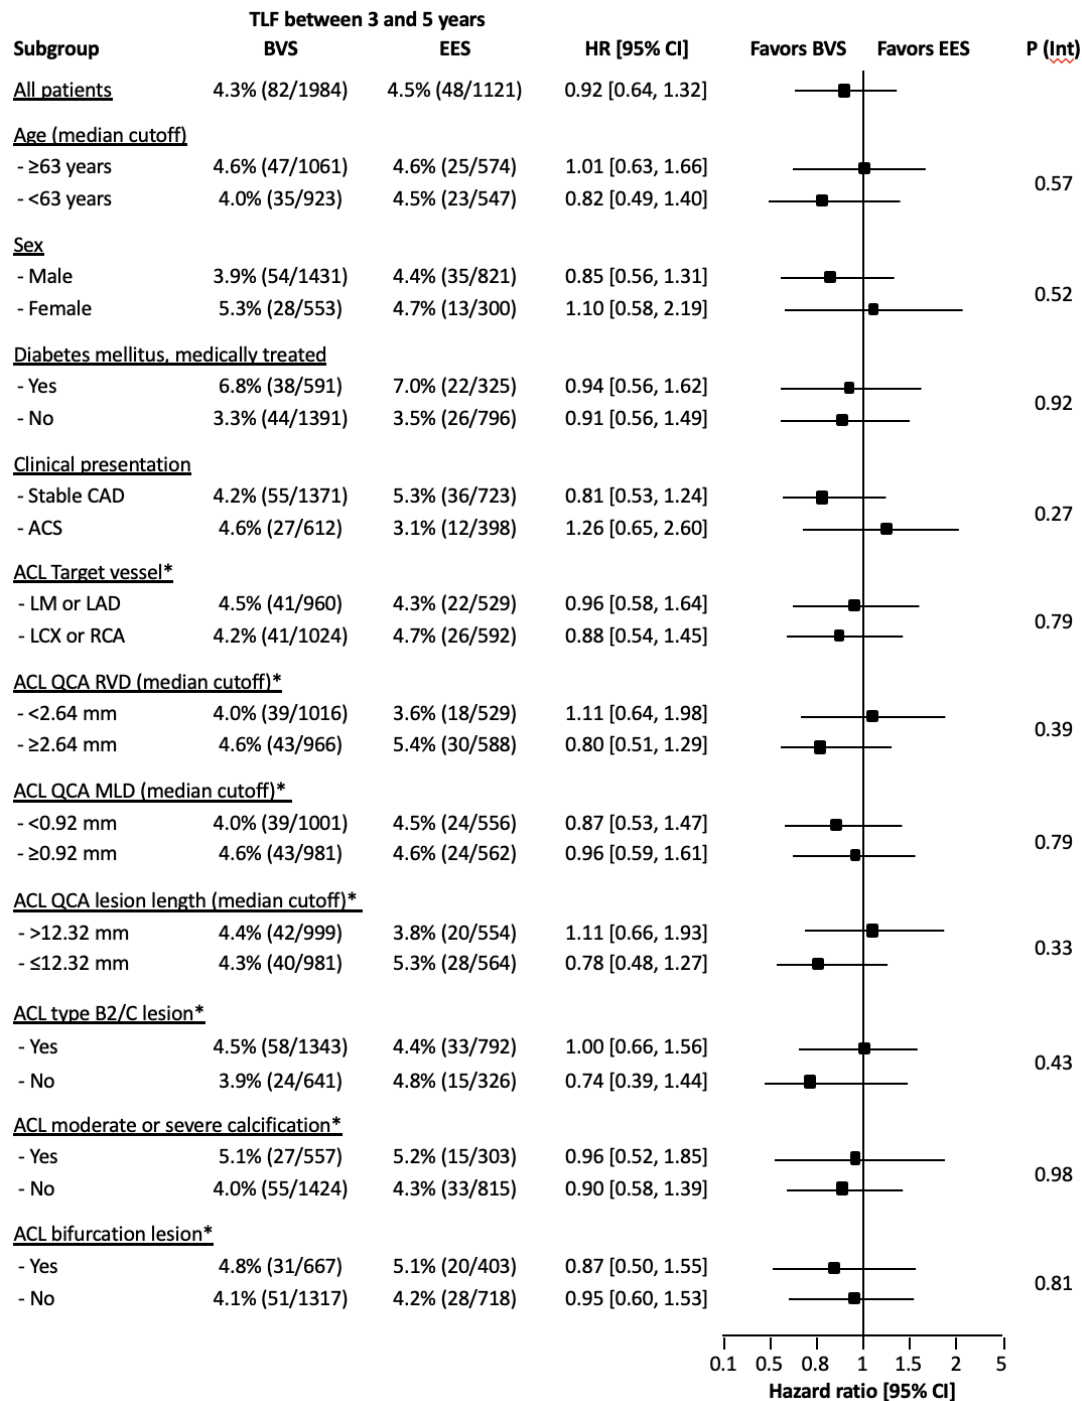

**eFigure 3. Aggregate level meta-analysis, cumulative outcomes through 5 years**

A) Target lesion failure (cardiac death, target-vessel-related myocardial infarction or ischemia-driven target lesion revascularization; B) Cardiac death; C) Target-vessel-related myocardial infarction; D) Ischemia-driven target lesion revascularization; E) Patient-oriented composite endpoint (add death, all myocardial infarction or all revascularization; F) Device thrombosis (definite or probable)

**eFigure 3A.**

**Target lesion failure through 5 years**

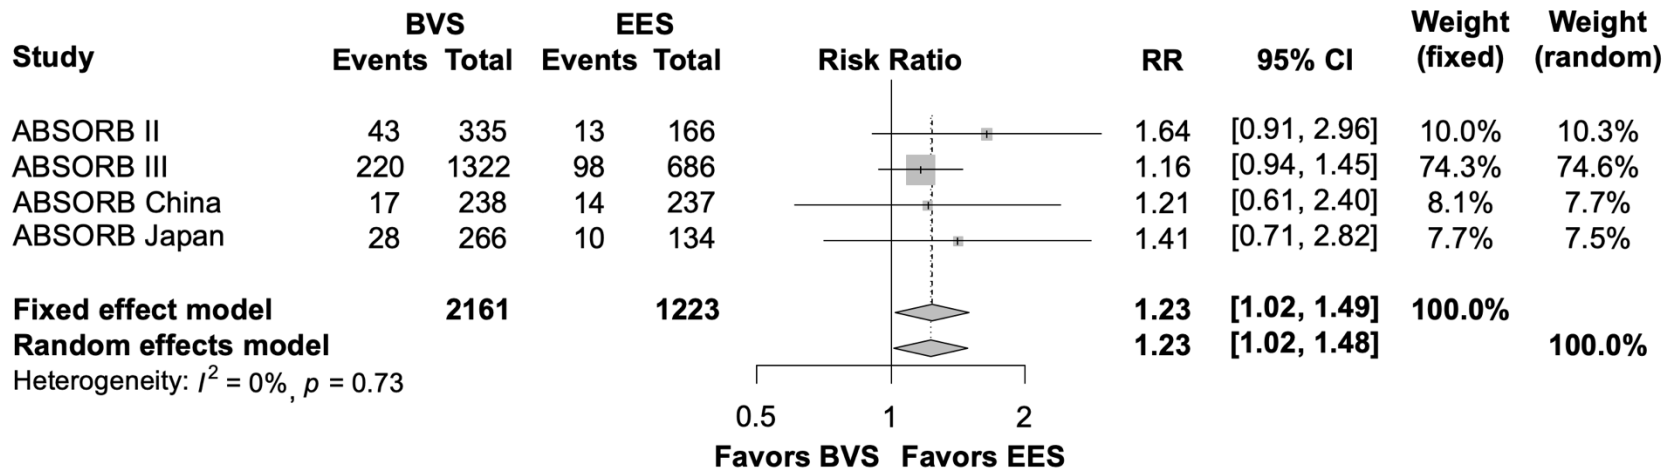

eFigure 3B.

### Cardiac death through 5 years

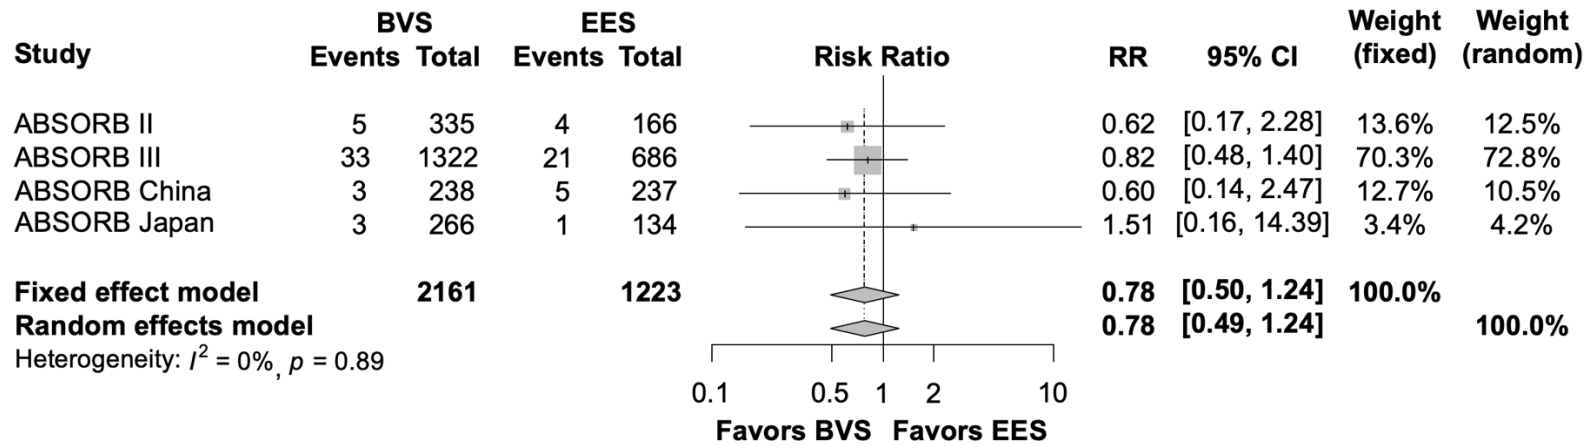

eFigure 3C.

### Target-vessel-related myocardial infarction through 5 years

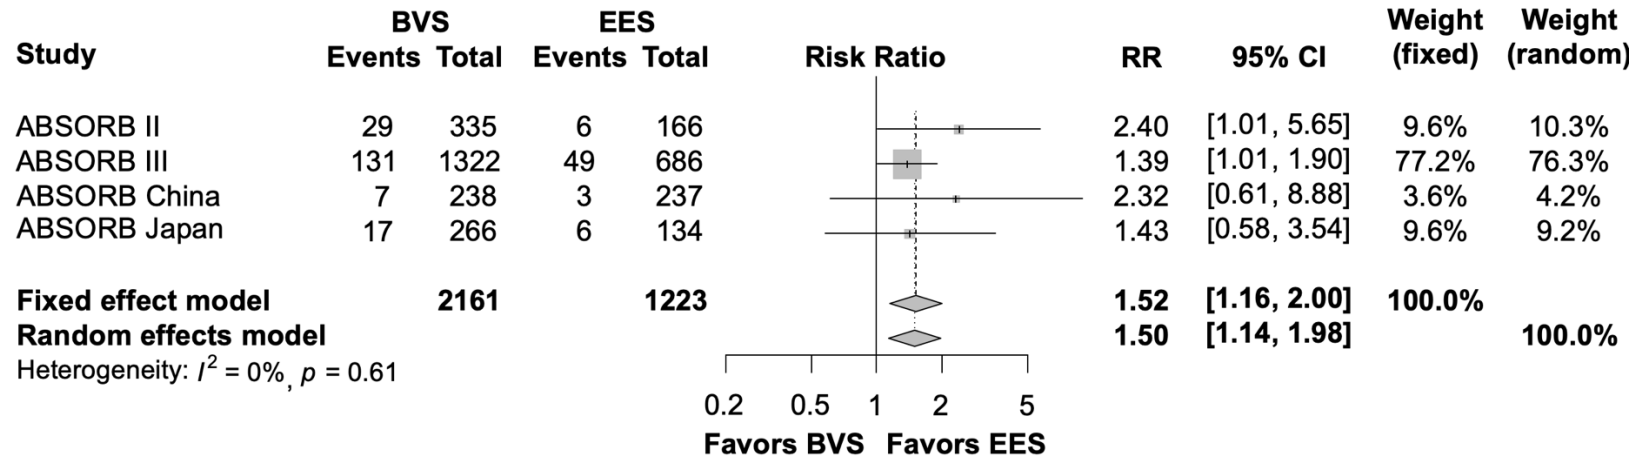



eFigure 3D.

### Ischemia-driven target lesion revascularization through 5 years

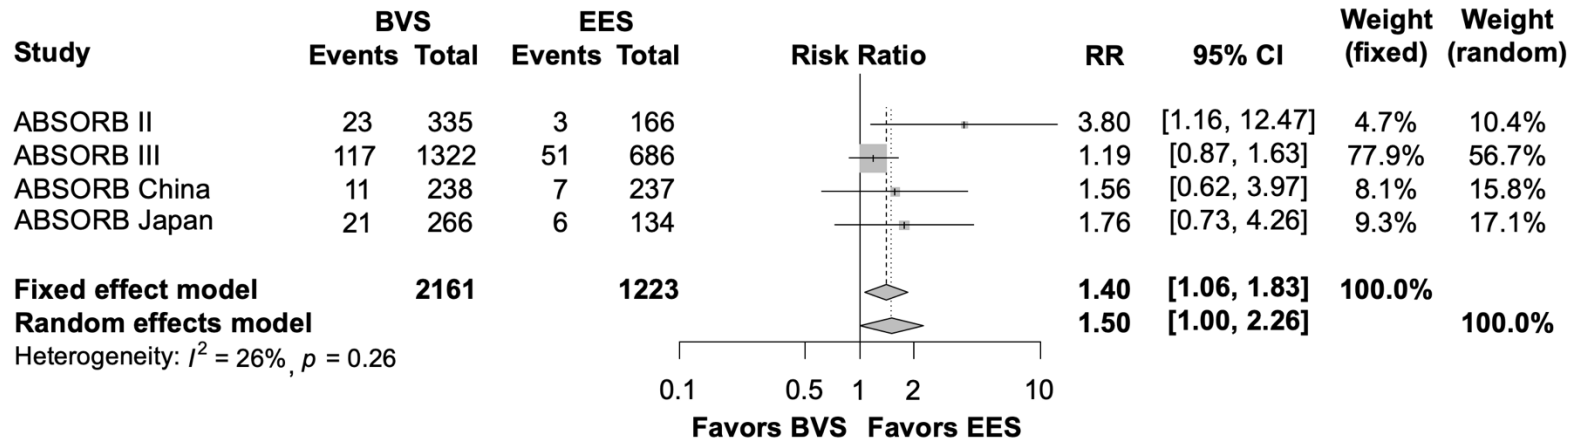

eFigure 3E.

### Patient-oriented composite endpoint through 5 years

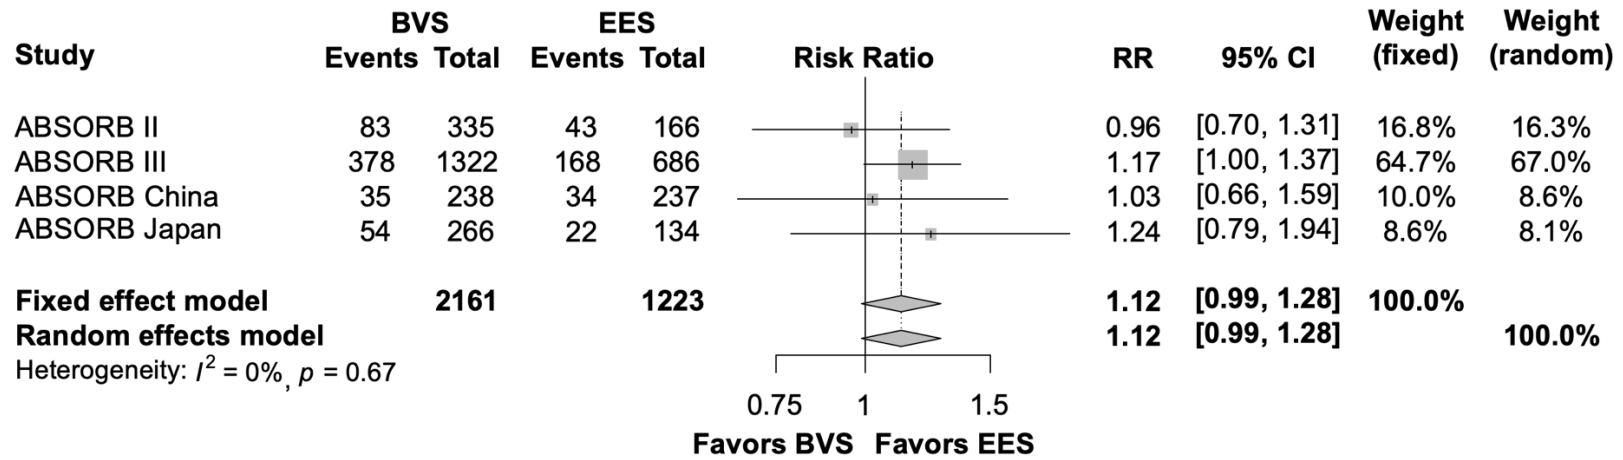

eFigure 3F.

### Device thrombosis (definite or probable) through 5 years

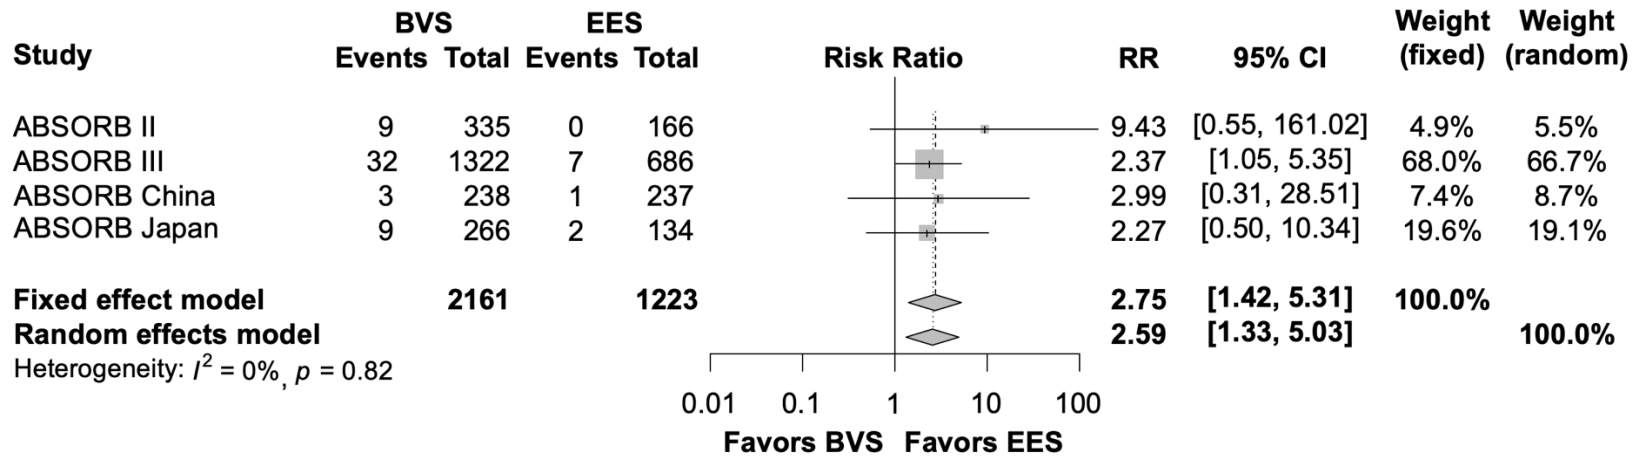

**eFigure 4. Aggregate level meta-analysis, cumulative outcomes through 3 years**

A) Target lesion failure (cardiac death, target-vessel-related myocardial infarction or ischemia-driven target lesion revascularization; B) Cardiac death; C) Target-vessel-related myocardial infarction; D) Ischemia-driven target lesion revascularization; E) Patient-oriented composite endpoint (add death, all myocardial infarction or all revascularization; F) Device thrombosis (definite or probable)

**eFigure 4A.**

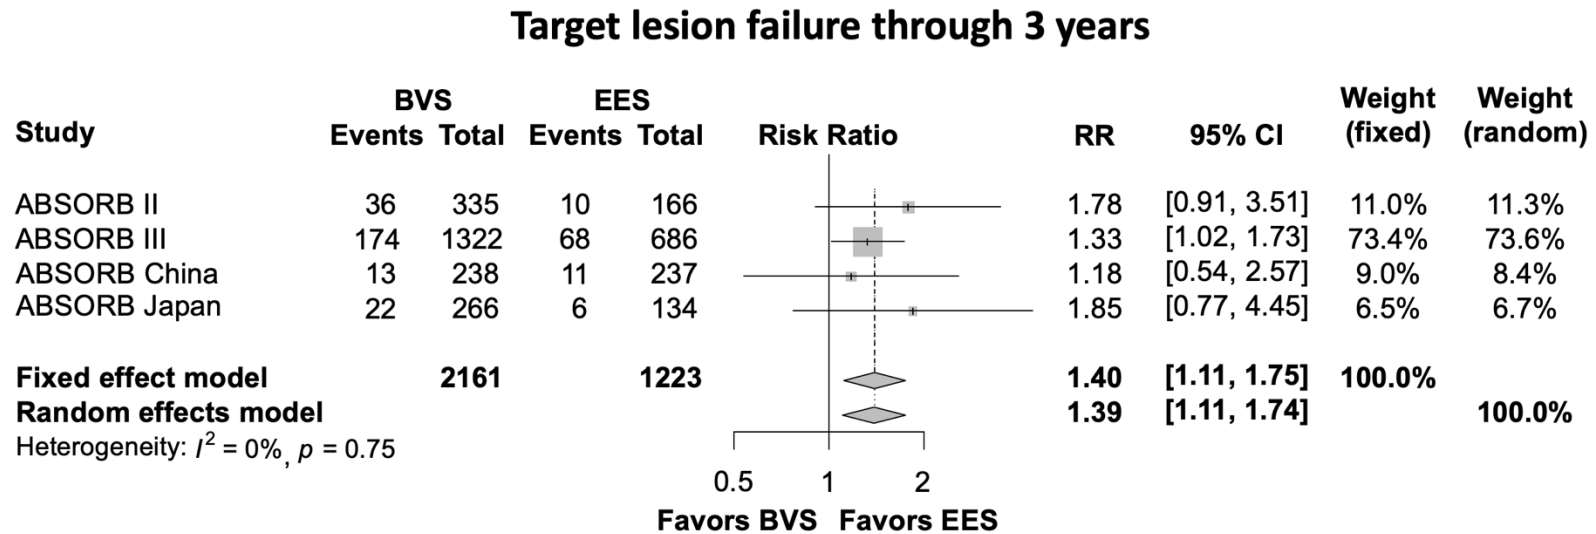

eFigure 4B.

### Cardiac death through 3 years

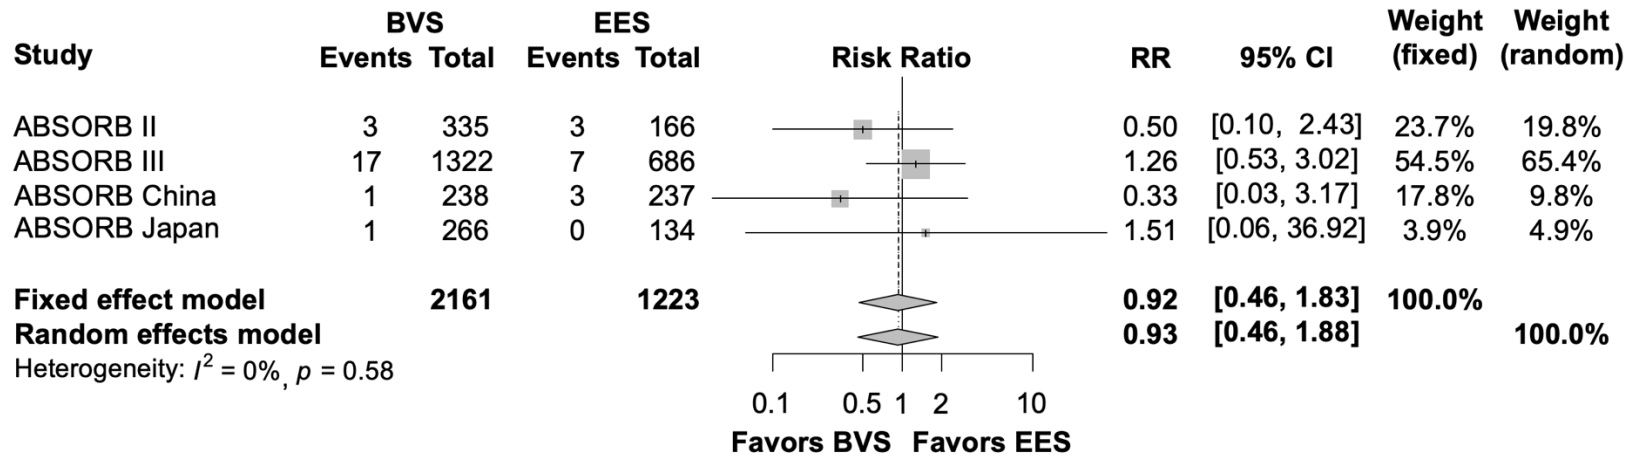

eFigure 4C.

### Target-vessel-related myocardial infarction through 3 years

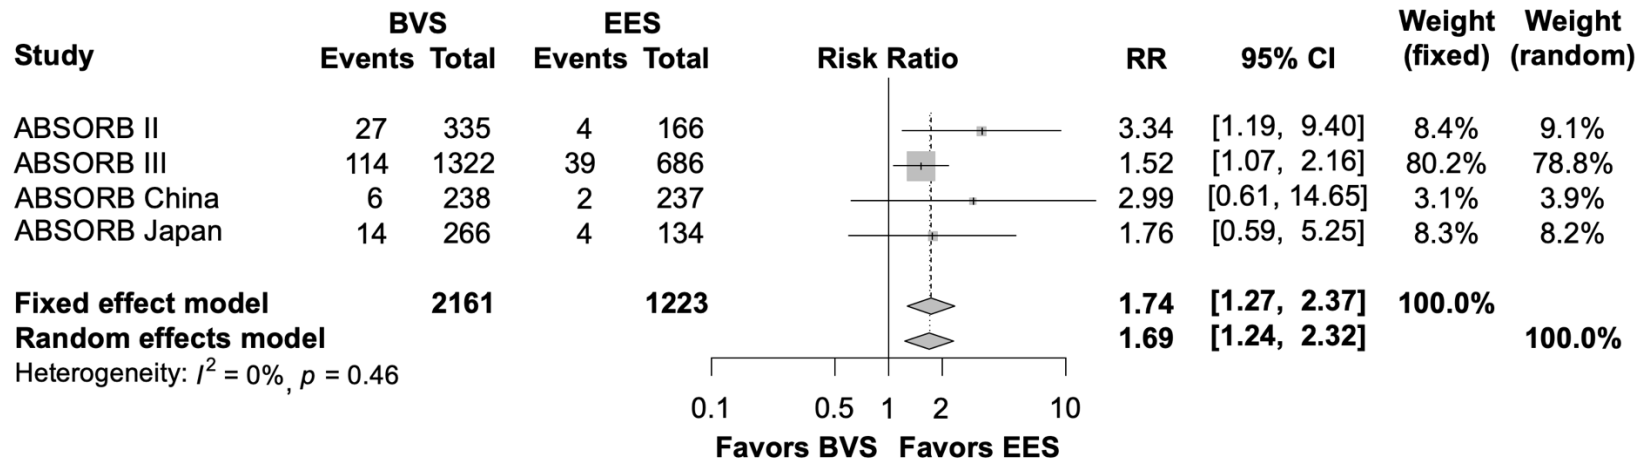

eFigure 4D.

### Ischemia-driven target lesion revascularization through 3 years

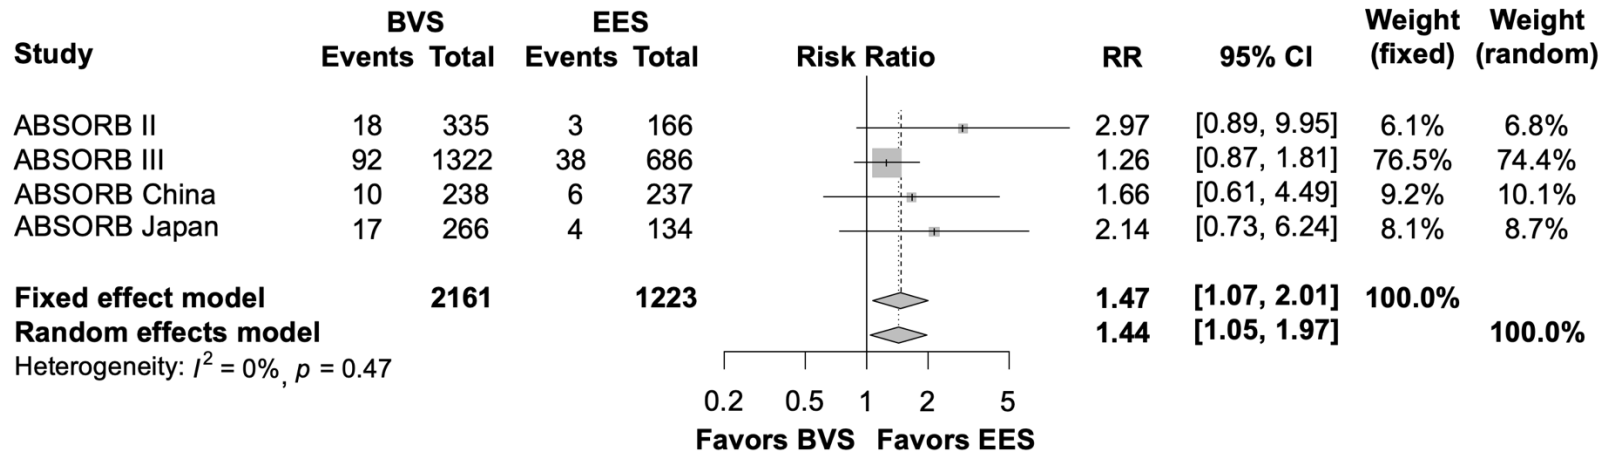

eFigure 4E.

### Patient-oriented composite endpoint through 3 years

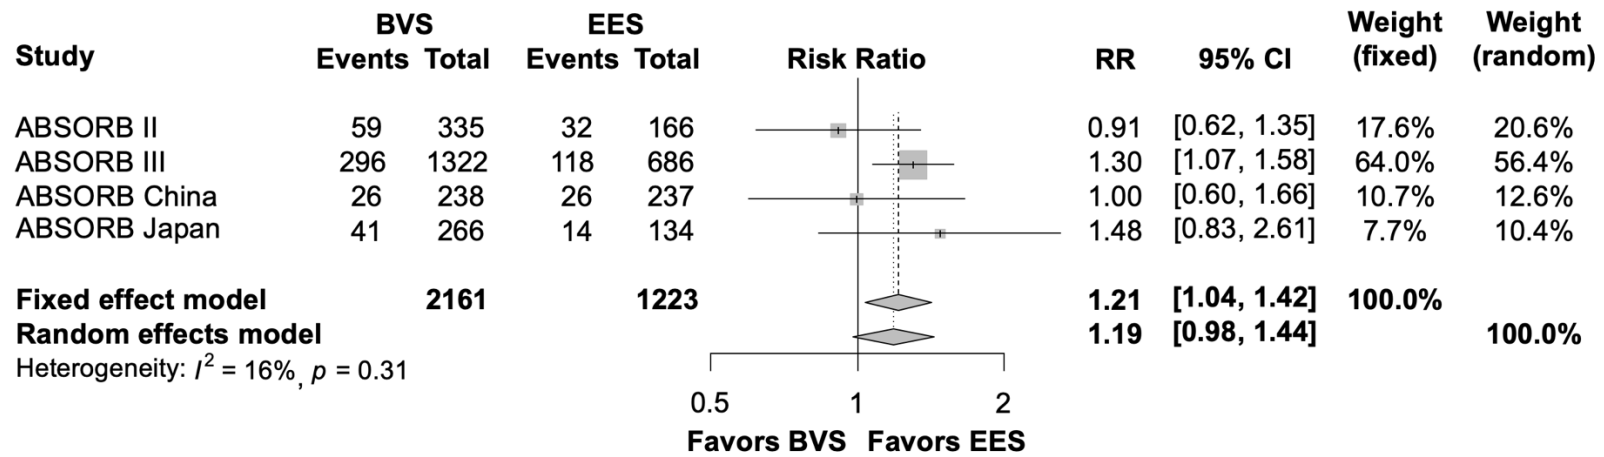



eFigure 4F.

### Device thrombosis (definite or probable) through 3 years

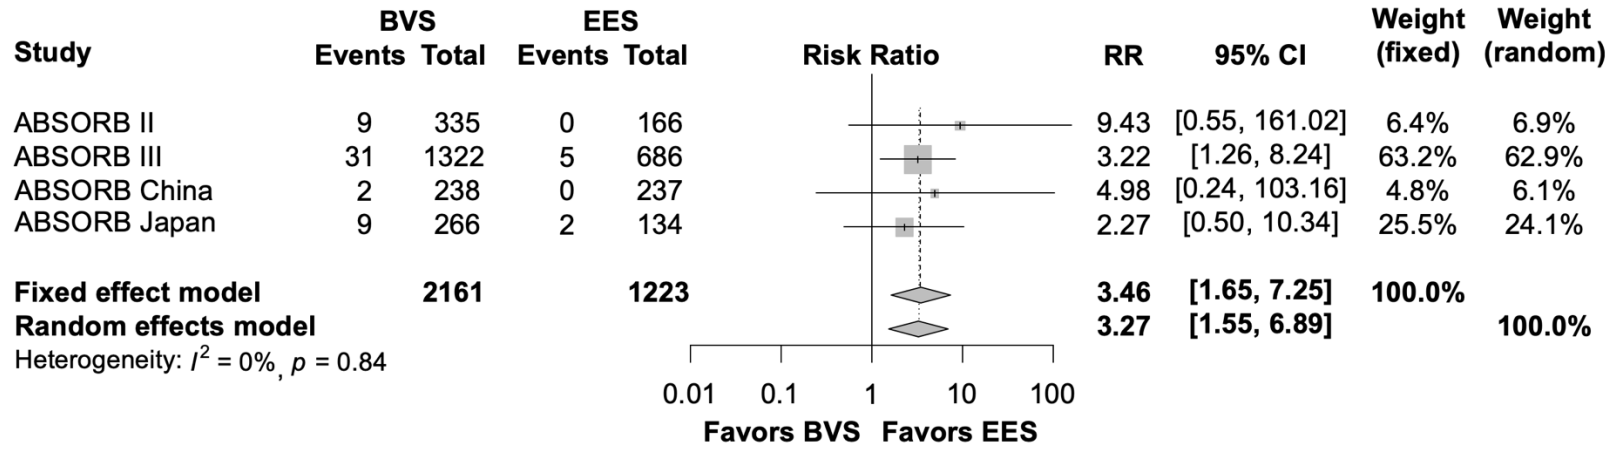

**eFigure 5. Aggregate level meta-analysis, cumulative outcomes between 3 and 5 years**

A) Target lesion failure (cardiac death, target-vessel-related myocardial infarction or ischemia-driven target lesion revascularization; B) Cardiac death; C) Target-vessel-related myocardial infarction; D) Ischemia-driven target lesion revascularization; E) Patient-oriented composite endpoint (add death, all myocardial infarction or all revascularization; F) Device thrombosis (definite or probable)

**eFigure 5A.**

**Target lesion failure between 3 and 5 years**

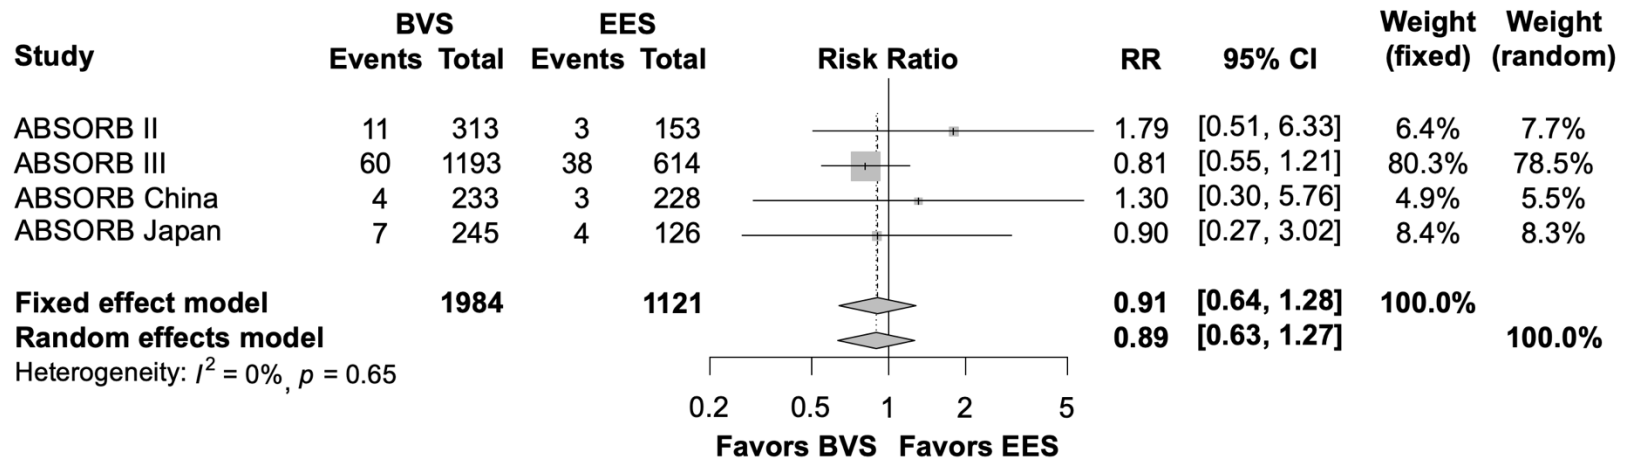

eFigure 5B.

### Cardiac death between 3 and 5 years

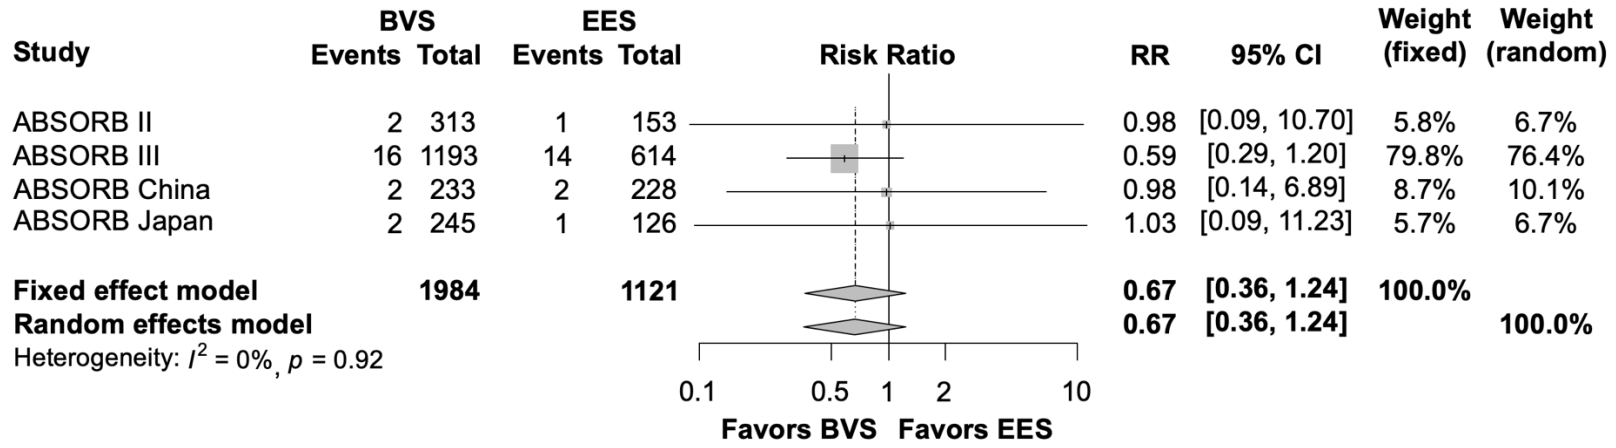

eFigure 5C.

### Target-vessel-related myocardial infarction between 3 and 5 years

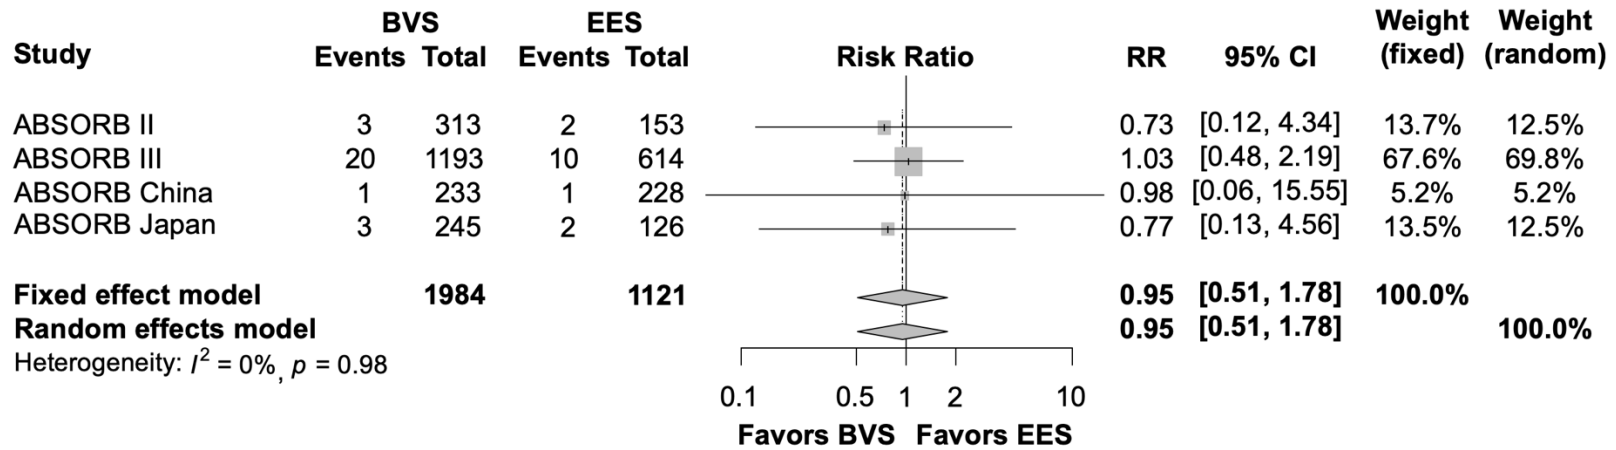

eFigure 5D.

### Ischemia-driven target lesion revascularization between 3 and 5 years

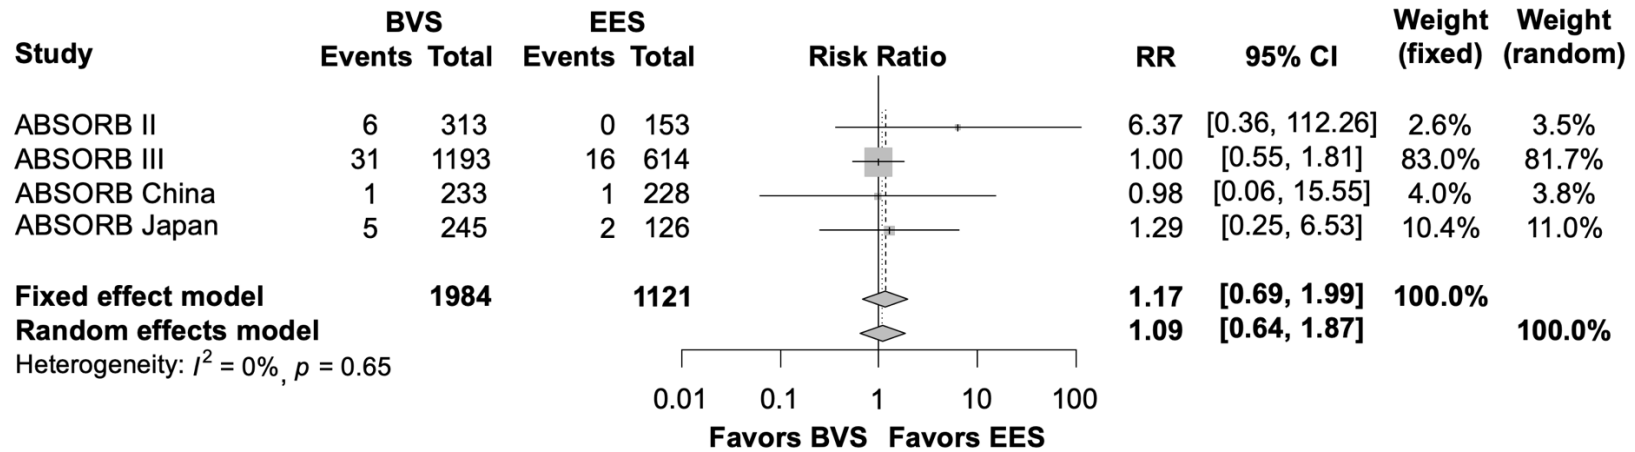

eFigure 5E.

### Patient-oriented composite endpoint between 3 and 5 years

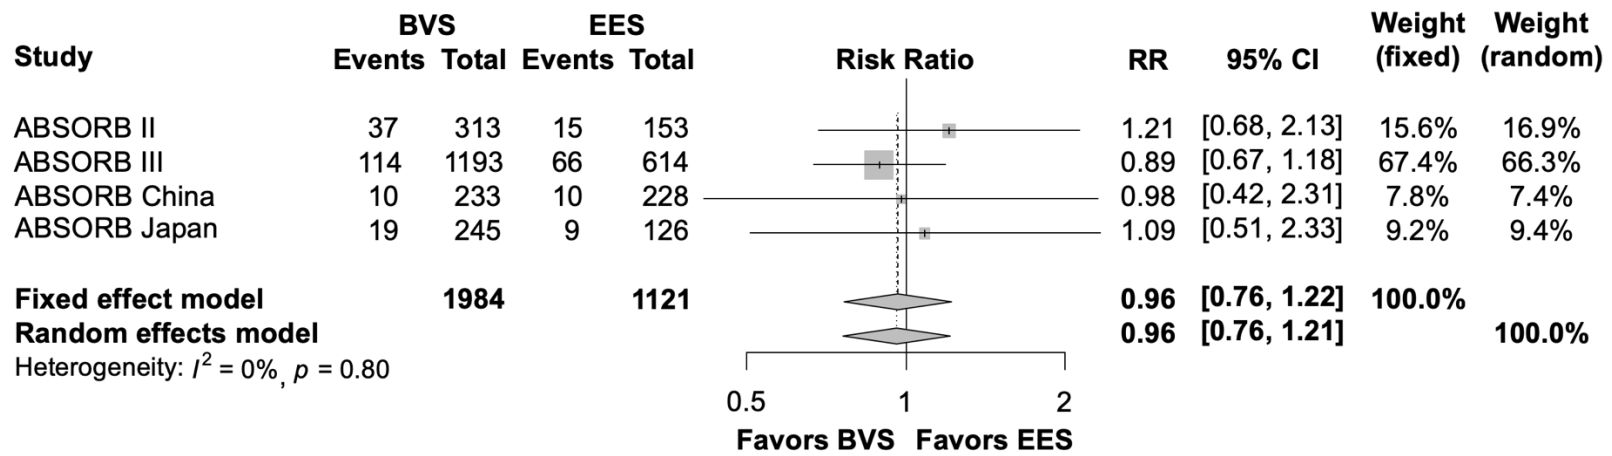

eFigure 5F.

### Device thrombosis (definite or probable) between 3 and 5 years

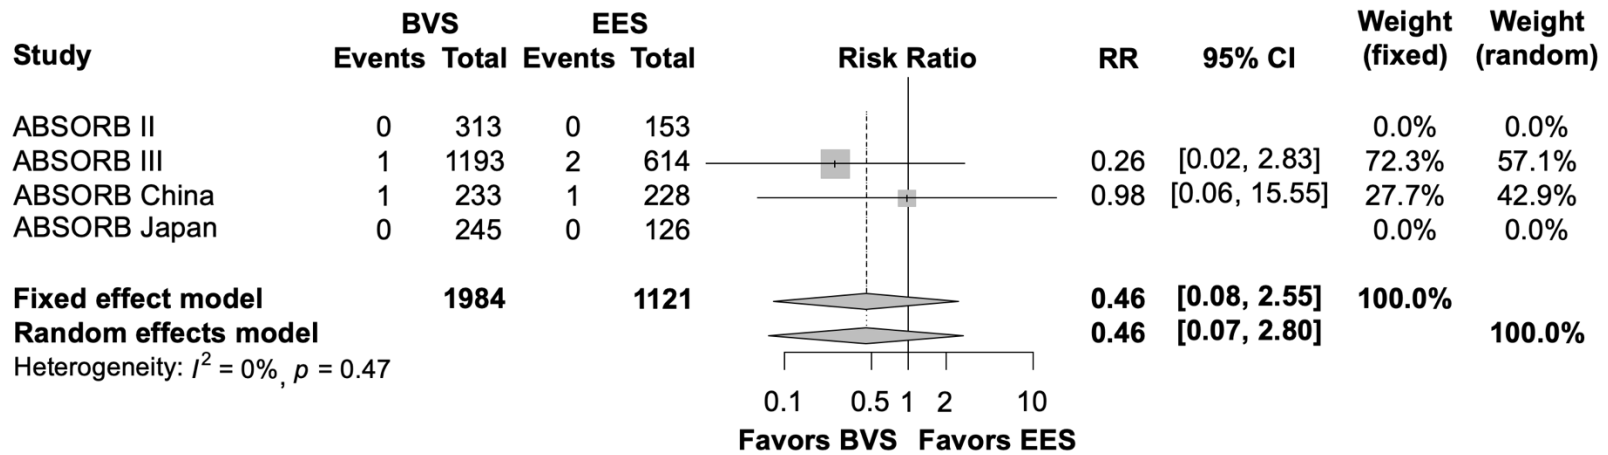

Supplement: jamacardiol-4-1261-s001.pdf [file jamacardiol-4-1261-s001.pdf]
